# Supplementary material for: Soymilk residue (okara) as a natural immobilization carrier for Lactobacillus plantarum cells enhances soymilk fermentation, glucosidic isoflavone bioconversion, and cell survival under simulated gastric and intestinal conditions
Source: PeerJ. 2016 Nov 10;4:e2701. doi: 10.7717/peerj.2701 (PMC5111894; doi:10.7717/peerj.2701)
Supplement: Data S6 — Raw data for analysis of Fermentation parameters during soymilk fermentation using free and immobilized L. plantarum 70810. FL: free L. plantarum 70810; IL:okara-immobilized L. plantarum 70810. [file peerj-04-2701-s006.xlsx]

## Sheet: Sheet1
		FL								IL
	pH	Time(h)								Time(h)
		0	6.52	6.67	6.43					0	6.52	6.67	6.43
		2	5.94	5.89	5.99					2	5.41	5.66	5.59
		4	5.41	5.34	5.48					4	5.15	5.28	5.14
		6	4.78	4.81	4.51					6	4.45	4.59	4.41
		8	4.37	4.46	4.56					8	4.26	4.13	4.15								0.06028
																					0.05686
																					0.04583
																					0.07506
	TA	FL																			0.06557
		time(h)	wight of simple m(g)	C(NaOH)(mol/L)	V(NaOH)(ml)	TA(。T)
		0	10.059	0.1002	1.92	19.1256
		0	10.001	0.1002	1.88	18.8357
		0	10.082	0.1002	2.14	21.2684
		2	10.101	0.1002	2	19.8396
		2	10.101	0.1002	2.02	20.038
		2	10.006	0.1002	2	20.028
		4	10.074	0.1002	3.02	30.0381
		4	10.093	0.1002	2.9	28.7903
		4	10.066	0.1002	3.14	31.2565
		6	10.133	0.1002	4.34	42.916
		6	10.02	0.1002	4.56	45.6
		6	10.061	0.1002	4.2	41.8288
		8	10.039	0.1002	4.82	48.1088
		8	10.032	0.1002	4.92	49.1411
		8	10.013	0.1002	5.08	50.8355
		IL
		time(h)
		0	10.025	0.1002	1.92	19.1904
		0	10.044	0.1002	1.9	18.9546
		0	10.018	0.1002	2.12	21.2042
		2	10.092	0.1002	2.12	21.0488
		2	10.015	0.1002	2.16	21.6108
		2	10.024	0.1002	2.08	20.7917
		4	10.078	0.1002	3.82	37.9802
		4	10.013	0.1002	4.08	40.8285
		4	10.019	0.1002	4.3	43.0043
		6	10.188	0.1002	5.5	54.0931
		6	10.089	0.1002	4.82	47.8704
		6	10.027	0.1002	5.14	51.3641
		8	10.026	0.1002	6.12	61.1634
		8	10.048	0.1002	6.32	63.0239
		8	10.032	0.1002	6.78	67.7189
	Viscosity	FL	mPa.s							IL
		Time(h)								Time(h)
		0	33.053	45.293	51.585					0	33.294	45.237	51.135
		2	331.594	357.993	389.296					2	502.774	579.303	614.205
		4	361.364	407.305	389.027					4	722.299	826.883	1003.21
		6	2154.29	2349.24	2457.29					6	2443.43	2564.94	2678.92
		8	3045.28	3298.29	3365.11					8	3387.29	3411.82	3452.54
