# Supplementary material for: Soymilk residue (okara) as a natural immobilization carrier for Lactobacillus plantarum cells enhances soymilk fermentation, glucosidic isoflavone bioconversion, and cell survival under simulated gastric and intestinal conditions
Source: PeerJ. 2016 Nov 10;4:e2701. doi: 10.7717/peerj.2701 (PMC5111894; doi:10.7717/peerj.2701)
Supplement: Data S7 — Row data for Table 1 [file peerj-04-2701-s007.xlsx]

## Sheet: lactic and acetic  acids
	lactic acid(mg/ml)
	FL						IL
	Time(h)						Time(h)
	0	0.97	0.92	0.9			0	0.99	0.91	0.95
	4	1.84	1.78	1.7			4	2.06	1.98	2.11
	8	4.64	4.89	4.55			8	5.36	5.21	5.39
	acetic(mg/ml)
	FL
	Time(h)						Time(h)
	0	1.04	0.98	0.91			0	1.01	0.96	1.09
	4	1.24	1.19	1.3			4	1.35	1.39	1.48
	8	1.92	1.79	1.99			8	2.11	2.24	2.3
