# Supplementary material for: Soymilk residue (okara) as a natural immobilization carrier for Lactobacillus plantarum cells enhances soymilk fermentation, glucosidic isoflavone bioconversion, and cell survival under simulated gastric and intestinal conditions
Source: PeerJ. 2016 Nov 10;4:e2701. doi: 10.7717/peerj.2701 (PMC5111894; doi:10.7717/peerj.2701)
Supplement: Data S9 — Raw data of bacterial count for analysis of the effect of acidic conditions on the survival of free and immobilized L. plantarum 70810. FL: free L. plantarum 70810; IL:okara-immobilized L. plantarum 70810. [file peerj-04-2701-s009.xlsx]

## Sheet: Sheet1
		pH=3.5
		FL								IL
		Time(h)								Time(h)
		0	1150000000	1740000000	760000000					0	1380000000	2090000000	910000000
		1	182000000	263000000	126000000					1	269000000	400000000	182000000
		3	153000000	251000000	95500000					3	263000000	380000000	182000000
		pH=2.5
		FL								IL
		Time(h)								Time(h)
		0	1150000000	1740000000	760000000					0	1380000000	2090000000	910000000
		1	102000000	145000000	72000000					1	178000000	245000000	129000000
		3	41700000	60000000	28800000					3	155000000	251000000	95000000
		pH=1.5
		FL								IL
		Time(h)								Time(h)
		0	1150000000	1740000000	760000000					0	1380000000	2090000000	910000000
		1	5400000	7200000	4000000					1	23400000	33100000	16600000
		3	76000	95000	60000					3	1620000	2040000	1290000
