# Supplementary material for: Soymilk residue (okara) as a natural immobilization carrier for Lactobacillus plantarum cells enhances soymilk fermentation, glucosidic isoflavone bioconversion, and cell survival under simulated gastric and intestinal conditions
Source: PeerJ. 2016 Nov 10;4:e2701. doi: 10.7717/peerj.2701 (PMC5111894; doi:10.7717/peerj.2701)
Supplement: Data S11 — Raw data of bacterial count for analysis of the effect of bile salts on the survival of free and immobilized L. plantarum 70810. FL: free L. plantarum 70810; IL:okara-immobilized L. plantarum 70810. [file peerj-04-2701-s011.xlsx]

## Sheet: Sheet1
	0.001
	FL								IL
	Time(h)								Time(h)
	0	1120000000	720000000	1740000000					0	2340000000	1450000000	890000000
	1	1000000000	1510000000	660000000					1	1260000000	1820000000	870000000
	3	1020000000	540000000	740000000					3	1150000000	780000000	1700000000
	0.002
	FL								IL
	Time(h)								Time(h)
	0	1120000000	720000000	1740000000					0	1450000000	2340000000	890000000
	1	204000	158000	263000					1	98000000	135000000	71000000
	3	51000	41000	65000					3	15500000	21900000	11000000
	0.003
	FL								IL
	Time(h)								Time(h)
	0	1120000000	720000000	1740000000					0	1450000000	2340000000	890000000
	1	15100	12300	18600					1	24000000	31000000	18600000
	3	8700	7400	10200					3	1950000	2630000	1450000
