# Supplementary material for: Soymilk residue (okara) as a natural immobilization carrier for Lactobacillus plantarum cells enhances soymilk fermentation, glucosidic isoflavone bioconversion, and cell survival under simulated gastric and intestinal conditions
Source: PeerJ. 2016 Nov 10;4:e2701. doi: 10.7717/peerj.2701 (PMC5111894; doi:10.7717/peerj.2701)
Supplement: Data S12 — A, cells shedding from okara under different ultrasound power for 6 min at initial temperature of 10 °C. B, cells shedding from okara under ultrasound power of 160W for different time at initial temperature of 10 °C. C, cells shedding from okara under ultrasound power of 160W for 10 min at different initial temperature. [file peerj-04-2701-s013.xlsx]

## Sheet: Sheet1
		Ultrasonic power (W)
		100	1320000000	1150000000	1380000000
		120	1410000000	1230000000	1350000000
		140	1640000000	1510000000	1860000000
		160	12000000000	7200000000	12900000000
		180	1700000000	1910000000	1550000000
		Ultrasonic time(min)
		2	650000000	510000000	710000000
		6	1290000000	1450000000	1350000000
		10	13200000000	14100000000	7800000000
		14	1380000000	1350000000	1510000000
		18	680000000	560000000	690000000
		Ultrasonic temperature(°C ）
		10	5800000000	3700000000	6500000000
		20	14100000000	12900000000	20000000000
		30	2290000000	2820000000	2140000000
		40	1620000000	1950000000	1660000000
		50	1290000000	1410000000	1550000000
